# Supplementary material
Source: PubMed Central journal article supplement (PMC7453341)
Supplement: jamaophthalmol-e203090-s001.pdf [file jamaophthalmol-e203090-s001.pdf]

## Supplementary Online Content

Gensheimer WG, Miller KE, Stowe J, Little J, Legault GL. Military teleophthalmology in Afghanistan using mobile phone application. *JAMA Ophthalmol*. Published online August 27, 2020. doi:10.1001/jamaophthalmol.2020.3090

### **eTable.** Patient Outcomes

This supplementary material has been provided by the authors to give readers additional information about their work.

**eTable 1.** Patient Outcomes

| <b>Outcome</b>                    | <b>Description</b>                                                                                                                                                                    |
|-----------------------------------|---------------------------------------------------------------------------------------------------------------------------------------------------------------------------------------|
| Return to duty                    | No restrictions                                                                                                                                                                       |
| Restricted duty                   | Restricted from performing certain duties or activities due to an illness or injury                                                                                                   |
| Quarters                          | Excusal from duty for a period of more than 24 hours to a maximum of 14 days due to an illness or injury that did not require hospitalization                                         |
| Medical redeployment              | Redeployment to home station due to illness or injury                                                                                                                                 |
| Redeployment in less than 1 month | Service member was already scheduled to redeploy to home station so medical redeployment was not recommended and the patient followed up as recommended when returned to home station |
| Admission                         | Admission to a hospital for observation                                                                                                                                               |
| Surgery                           | Admission to a hospital for a surgical procedure                                                                                                                                      |
